# Supplementary material
Source: MDPI journal article supplement (https://www.mdpi.com/2075-163X/11/3/333)
Supplement: s1 [file s1]

## Sheet: FL1
Analysis	Mineral	Type	SiO2	TiO2	Al2O3	FeO	MnO	MgO	CaO	Na2O	K2O	P2O5	Total
FL1_b_05.spc	fld	micro	60.93	0.76	21.4	1.72	0.27	0.58	5.24	7.06	1.61	0.34	99.91
FL1_b_02.spc	fld	micro	60.16	0.97	19.23	4.22	0.11	0.93	4.12	7.02	2.81	0.35	99.92
FL1_c_03.spc	fld	micro	60.01	0.6	22.68	1.71	0.25	0.51	5.65	7.09	1.26	0.13	99.89
FL1_c_06.spc	fld	micro	59.62	0.35	23.93	1.31	0.13	0.31	6.81	6.43	1.03	0.09	100.01
FL1_c_04.spc	fld	micro	59.18	1.06	21.23	2.86	0.18	0.68	5.96	6.37	1.91	0.46	99.89
FL1_b_04.spc	fld	micro	59.13	0.42	23.27	1.49	0.18	0.48	6.91	6.55	1.02	0.28	99.73
FL1_b_03.spc	fld	micro	58.96	0.59	23.5	1.8	0.18	0.49	6.76	6.54	1.18	0	100
FL1_b_01.spc	fld	micro	58.63	0.47	24.26	1.27	0.12	0.38	7.39	6.13	1.04	0.15	99.84
FL1_c_05.spc	fld	micro	58.15	0.62	23.55	1.85	0.18	0.28	6.94	6.87	1.08	0.24	99.76
FL1_c_01.spc	fld	micro	57.57	0.66	24	1.78	0.16	0.45	7.15	6.4	1.04	0.39	99.6
FL1_c_02.spc	fld	micro	57.15	0.93	20.65	4.76	0.25	1.47	6.48	5.87	1.52	0.62	99.7
FL1_a_03.spc	fld	micro-pheno	56.43	0.42	25.86	1.08	0.3	0.22	8.43	5.94	0.69	0.31	99.68
FL1_a_02.spc	fld	pheno	55.49	0.33	26.94	0.94	0.19	0.14	9.51	5.48	0.56	0.13	99.71
FL1_a_01.spc	fld	pheno	54.39	0.25	27.69	0.82	0.24	0.27	10.22	5.25	0.48	0.2	99.81

## Sheet: FOAM1
Analysis	Mineral	Type	SiO2	TiO2	Al2O3	FeO	MnO	MgO	CaO	Na2O	K2O	Total
Foam1_b_07.spc	fld	micro	66.15	0.28	18.98	0.6	0.05	0.11	0.71	7.27	5.43	99.58
Foam1_c_05.spc	fld	micro	65.9	0.32	18.89	0.5	0.05	0.17	0.89	6.51	6.44	99.67
Foam1_c_03.spc	fld	micro	65.88	0.34	18.9	0.59	0	0.18	0.79	6.98	5.9	99.56
Foam1_a_07.spc	fld	micro	65.42	0.3	19.65	0.63	0.07	0.11	1.37	7.61	4.43	99.59
Foam1_b_06.spc	fld	micro	65.4	0.22	19.44	0.54	0.11	0.22	1.01	7.53	5.13	99.6
Foam1_b_10.spc	fld	micro	65.38	0.42	18.85	0.63	0.16	0.18	0.7	7.02	6.23	99.57
Foam1_c_04.spc	fld	micro	65.28	0.3	19.48	0.61	0.08	0.18	1.4	6.81	5.45	99.59
Foam1_b_03.spc	fld	micro	65.23	0.26	19.3	0.67	0.09	0.12	0.85	7.27	5.62	99.41
Foam1_b_01.spc	fld	micro	65.18	0.31	19.41	0.59	0.14	0.13	0.95	7.17	5.58	99.46
Foam1_c_02.spc	fld	micro	65.15	0.57	19.52	0.49	0.12	0.16	1.29	7.62	4.73	99.65
Foam1_d_07.spc	fld	micro	65.11	0.5	19.54	0.59	0.05	0.2	0.97	7.52	5.12	99.6
Foam1_c_09.spc	fld	micro	65	0.46	18.98	0.78	0.21	0.32	1.26	6.95	5.52	99.48
Foam1_a_03.spc	fld	micro	64.99	0.48	19.28	0.87	0.14	0.15	1.43	6.89	5.22	99.45
Foam1_a_05.spc	fld	micro	64.81	0.4	18.59	1.41	0.13	0.65	1.33	7.17	5.08	99.57
Foam1_a_06.spc	fld	micro	64.71	0.47	19.35	0.92	0.11	0.39	0.95	7.45	4.99	99.34
Foam1_b_09.spc	fld	micro	64.68	0.45	20.49	0.59	0	0.2	1.92	7.83	3.53	99.69
Foam1_d_09.spc	fld	micro	64.54	0.37	19.42	0.88	0.09	0.43	1.54	7.2	5.09	99.56
Foam1_a_02.spc	fld	micro	64.19	0.62	20.41	0.71	0.07	0.11	2.29	7.31	3.73	99.44
Foam1_b_02.spc	fld	micro	64.09	0.51	20.07	0.71	0.17	0.16	1.71	7.91	4.07	99.4
Foam1_a_10.spc	fld	micro	63.99	0.44	20.7	0.64	0.13	0.23	2.55	7.86	2.99	99.53
Foam1_d_02.spc	fld	micro	63.93	0.29	20.38	0.71	0.06	0.24	1.63	7.72	4.36	99.32
Foam1_b_04.spc	fld	micro	63.69	0.34	21.01	0.66	0.11	0.2	2.85	7.88	2.66	99.4
Foam1_a_08.spc	fld	micro	63.38	0.58	18.7	1.36	0.15	0.63	3.2	7.2	4.25	99.45
Foam1_c_01.spc	fld	micro	62.7	0.4	21.71	0.71	0.09	0.14	3.52	7.92	2.31	99.5
Foam1_a_04.spc	fld	micro	62.68	0.47	21.69	0.79	0.04	0.11	3.74	7.77	2.17	99.46
Foam1_b_05.spc	fld	micro	62.62	0.29	22.49	0.75	0	0.06	3.94	8.09	1.76	100
Foam1_d_10.spc	fld	micro	62.59	0.63	20.11	1.26	0.15	0.95	2.01	7.48	4.17	99.35
Foam1_c_06.spc	fld	micro	62.4	0.38	21.93	0.88	0	0.17	3.74	7.59	2.35	99.44
Foam1_d_01.spc	fld	micro	62.3	0.56	21.57	0.96	0.2	0.1	3.31	7.32	3.04	99.36
Foam1_b_08.spc	fld	micro	61.88	0.46	20.6	1.29	0.09	0.76	5	7.83	1.79	99.7
Foam1_d_05.spc	fld	micro	61.83	0.33	22.18	1.34	0	0.33	4.26	8.35	1.2	99.82
Foam1_c_10.spc	fld	micro	61.68	0.32	22.61	0.82	0.08	0.2	4.35	7.94	1.54	99.54
Foam1_c_08.spc	fld	micro	61.3	0.43	22.54	0.79	0	0.39	4.78	7.55	1.74	99.52
Foam1_a_01.spc	fld	micro	61.06	0.35	23.16	1.06	0.04	0.16	5.02	7.65	1.11	99.61
Foam1_a_09.spc	fld	micro	60.92	0.47	22.76	0.92	0.11	0.29	4.96	7.61	1.42	99.46
Foam1_d_04.spc	fld	micro	60.49	0.37	23.25	1.11	0.05	0.11	4.92	8.24	1	99.54
Foam1_c_07.spc	fld	micro	60.02	0.3	23.88	0.88	0.09	0.19	5.52	7.05	1.48	99.41
Foam1_d_08.spc	fld	micro	59.68	0.27	24.39	0.95	0	0.22	6.13	7.23	0.77	99.64
Foam1_d_03.spc	fld	micro	59.55	0.28	24.02	1.14	0.06	0.13	6.01	7.7	0.82	99.71
Foam1_d_06.spc	fld	micro	46.53	6.78	14.74	18.58	0.72	1.11	0.42	6.94	3.68	99.5
Foam1_d_28.spc	ox	micro	61.04	1.24	19.08	4.68	0.31	0.31	1.1	7.04	4.66	99.46
Foam1_d_29.spc	ox	micro	64.17	0.65	19.26	1.53	0.17	0.27	1.16	7.08	5.5	99.79
Foam1_a_11.spc	px	micro	54.35	1.09	3.39	8.31	0.65	12.85	16.32	1.42	1.15	99.53
Foam1_a_12.spc	px	micro	51.91	1.7	3.01	9	0.51	13.72	18.42	0.98	0.27	99.52
Foam1_a_13.spc	px	micro	51.95	1.52	2.57	9.1	0.53	13.62	18.92	1.11	0.25	99.57
Foam1_a_14.spc	px	micro	51.79	1.93	5.21	9.26	0.5	12.23	16.52	1.74	0.38	99.56
Foam1_a_15.spc	px	micro	36.01	0.77	7.58	4.06	0.45	4.71	42.38	2.51	1.02	99.49
Foam1_a_16.spc	px	micro	50.29	2.21	5.06	9.51	0.56	14.21	16.28	1.26	0.42	99.8
Foam1_a_17.spc	px	micro	44.31	0.3	5.44	22.11	1.64	21.98	0.43	1.65	1.8	99.66
Foam1_b_11.spc	px	micro	51.28	1.8	2.46	9.32	0.54	13.66	19.51	0.79	0.19	99.55
Foam1_b_13.spc	px	micro	48.13	2.95	5.46	9.59	0.47	13.42	18.62	0.85	0.2	99.69
Foam1_b_14.spc	px	micro	52.74	1.24	2.12	9.07	0.48	13.86	18.87	1.08	0.23	99.69
Foam1_b_15.spc	px	micro	52.13	1.71	5.42	7.55	0.44	10.5	19.34	2.05	0.73	99.87
Foam1_b_16.spc	px	micro	52.33	1.45	3.75	8.66	0.57	13.41	17.57	1.3	0.43	99.47
Foam1_b_17.spc	px	micro	51.81	1.45	2.88	9.1	0.58	13.34	18.68	1.18	0.28	99.3
Foam1_b_23.spc	px	micro	51.62	1.97	2.47	9.9	0.66	12.68	18.55	1.48	0.22	99.55
Foam1_c_11.spc	px	micro	53.14	1.71	4.76	9.65	0.61	11.25	15.7	1.93	0.89	99.64
Foam1_c_12.spc	px	micro	52.31	1.7	1.31	9.77	0.5	13.16	19.63	1.25	0.15	99.78
Foam1_c_13.spc	px	micro	55.88	1.21	2.24	9.68	0.76	12.55	15.46	1.07	0.68	99.53
Foam1_c_14.spc	px	micro	56.09	1.3	9.22	6.08	0.55	8.61	12.88	3.04	1.5	99.27
Foam1_c_15.spc	px	micro	54	0.33	16.41	1.84	0.35	0	18.47	5.49	2.78	99.67
Foam1_d_11.spc	px	micro	51.32	1.71	3.91	9.53	0.64	14.49	16.62	0.82	0.34	99.38
Foam1_d_12.spc	px	micro	50.63	2.06	5.41	8.81	0.61	12.45	17.33	1.5	0.61	99.41
Foam1_d_13.spc	px	micro	53.52	1.4	4.37	7.86	0.48	13.27	16.06	1.88	0.67	99.51
Foam1_d_14.spc	px	micro	53.97	1.42	5.2	8.37	0.37	12.36	15.27	2.48	0.5	99.94
Foam1_d_15.spc	px	micro	52.17	1.4	2.19	8.89	0.52	14.55	18.68	0.95	0.21	99.56
Foam1_d_16.spc	px	micro	54.19	0.88	1.93	8.38	0.37	14	18.46	1.74	0.05	100
Foam1_d_17.spc	px	micro	52.91	1.6	4.21	8.45	0.54	12.86	16.91	1.67	0.61	99.76
Foam1_d_18.spc	px	micro	41.53	1.03	3.36	7.52	0.52	10.36	33.12	1.54	0.64	99.62
Foam1_d_19.spc	px	micro	55.62	1.6	9.32	7.06	0.43	9.63	12.09	3.05	0.58	99.38
Foam1_d_20.spc	px	micro	54.62	1.35	9.52	7.6	0.5	9.89	11.83	2.79	1.5	99.6
Foam1_a_22.spc	ox	micro	43.36	14.38	14.46	17.17	0	0.87	2.14	5.98	1.49	99.85

## Sheet: TR1
Analysis	mineral	Type	bubble	SiO2	TiO2	Al2O3	FeO	MnO	MgO	CaO	Na2O	K2O	P2O5	Total
TR1_e_02.spc	fld	pheno	rich	96.89	0.17	1.13	0.3	0.19	0.17	0.12	0.38	0.24	0.08	99.67
TR1_e_01.spc	fld	pheno	rich	96.42	0.26	1.34	0.35	0.18	0.19	0.14	0.4	0.3	0.06	99.64
TR1_c_08.spc	fld	micro	rich	66.91	0.29	18.18	0.71	0.07	0.16	0.65	6.96	5.85	0.1	99.88
TR1_c_02.spc	fld	micro	rich	66.86	0.21	18.95	0.46	0.08	0.16	0.88	7.34	4.98	0	99.92
TR1_d_04.spc	fld	micro	rich	66.8	0.12	18.5	0.56	0.08	0.19	0.49	6.95	6.07	0	99.76
TR1_d_05.spc	fld	micro	rich	66.63	0.11	19.41	0.46	0	0.31	1.21	7.9	3.89	0	99.92
TR1_a_02.spc	fld	micro	poor	66.49	0.3	18.48	0.49	0	0.22	0.62	6.3	6.68	0.17	99.75
TR1_d_07.spc	fld	micro	rich	66.44	0.29	18.97	0.63	0.1	0	0.98	7.65	4.52	0.16	99.74
TR1_d_08.spc	fld	micro	rich	66.35	0.24	18.91	0.58	0.15	0.07	0.95	7.94	4.63	0	99.82
TR1_d_02.spc	fld	micro	rich	66.29	0.31	18.26	0.63	0.1	0.12	0.73	6.92	6.11	0.26	99.73
TR1_e_04.spc	fld	pheno	rich	66.04	0.29	18.91	0.49	0.1	0.17	0.83	6.89	6.06	0	99.78
TR1_d_03.spc	fld	micro	rich	66	0.24	18.67	0.52	0.14	0.22	0.61	6.52	6.72	0.18	99.82
TR1_a_05.spc	fld	micro	poor	65.95	0.29	18.97	0.48	0.15	0.15	1.01	7.58	4.98	0.18	99.74
TR1_b_02.spc	fld	micro	poor	65.87	0.33	19.16	0.57	0.14	0.09	1.02	7.44	5	0.14	99.76
TR1_b_10.spc	fld	micro	poor	65.85	0.35	19.1	0.6	0.14	0.14	0.74	6.62	6.08	0.1	99.72
TR1_h_03.spc	fld	micro	poor	65.74	0.22	19.49	0.4	0.1	0.23	0.94	9.17	3.47	0	99.76
TR1_h_02.spc	fld	micro	poor	65.68	0.38	18.92	0.68	0.15	0.19	0.66	7.54	5.54	0	99.74
TR1_c_07.spc	fld	micro	rich	65.61	0.41	19.12	0.7	0.21	0.25	1.42	7.43	4.36	0.14	99.65
TR1_h_05.spc	fld	micro	poor	65.49	0.32	19.42	0.45	0.11	0.15	0.88	8.25	4.42	0.23	99.72
TR1_c_10.spc	fld	micro	rich	65.48	0.26	19.49	0.6	0.18	0.16	1.41	7.92	3.9	0.22	99.62
TR1_b_05.spc	fld	micro	poor	65.46	0.27	19.68	0.67	0.15	0.23	1.46	8.05	3.81	0.14	99.92
TR1_d_09.spc	fld	micro	rich	65.45	0.29	19.22	0.6	0.22	0.2	1.1	7.3	5.24	0.09	99.71
TR1_c_01.spc	fld	micro	rich	65.41	0.34	19.42	0.66	0.2	0.13	1.46	7.66	4.62	0	99.9
TR1_d_01.spc	fld	micro	rich	65.4	0.33	18.62	0.61	0.24	0.25	0.94	6.9	5.9	0.29	99.48
TR1_e_03.spc	fld	pheno	rich	65.39	0.32	19.22	0.56	0.11	0.13	1.08	7.7	4.9	0.1	99.51
TR1_h_01.spc	fld	micro	poor	65.38	0.17	19.49	0.58	0.13	0.11	1.11	7.65	4.77	0.27	99.66
TR1_a_08.spc	fld	micro	poor	65.32	0.33	19.85	0.68	0.09	0.15	1.8	8.57	2.86	0.12	99.77
TR1_c_09.spc	fld	micro	rich	65.25	0.41	19.73	0.91	0.22	0.22	2.08	8.36	2.82	0	100
TR1_c_06.spc	fld	micro	rich	65.07	0.3	20.35	0.67	0	0.16	2.29	8.3	2.57	0.06	99.77
TR1_g_01.spc	fld	micro	poor	65.07	0.44	19.01	0.74	0.16	0.29	1.02	6.99	5.88	0.16	99.76
TR1_h_04.spc	fld	micro	poor	65.05	0.33	19.39	0.65	0.17	0.22	0.82	8.36	4.47	0.15	99.61
TR1_g_04.spc	fld	micro	poor	65.04	0.38	20.25	0.73	0.08	0.16	1.99	8.55	2.39	0.16	99.73
TR1_c_05.spc	fld	micro	rich	64.94	0.34	20.24	0.69	0.18	0.17	2.25	8.4	2.7	0	99.91
TR1_d_10.spc	fld	micro	rich	64.91	0.23	19.51	0.82	0.18	0.06	1.92	7.45	4.25	0.12	99.45
TR1_g_05.spc	fld	micro	poor	64.91	0.49	19.42	0.82	0.3	0.13	1.51	8.22	3.92	0.12	99.84
TR1_a_03.spc	fld	micro	poor	64.8	0.26	20.25	0.76	0	0.14	2.28	7.46	3.71	0.17	99.83
TR1_d_06.spc	fld	micro	rich	64.66	0.39	19.86	0.7	0.14	0.11	2.33	8.26	3.06	0.24	99.75
TR1_a_01.spc	fld	micro	poor	64.63	0.28	20.54	0.78	0.12	0.14	2.61	8.45	2.15	0.14	99.84
TR1_a_07.spc	fld	micro	poor	64.51	0.33	20.72	0.87	0.1	0.24	2.25	8.59	2.31	0	99.92
TR1_b_08.spc	fld	micro	poor	64.36	0.2	20.72	0.54	0.05	0.17	2.66	8.83	1.99	0.1	99.62
TR1_c_04.spc	fld	micro	rich	64.32	0.33	20.38	0.7	0.1	0.22	2.37	8.73	2.33	0.2	99.68
TR1_c_03.spc	fld	micro	rich	64.23	0.35	20.66	0.77	0.2	0.14	2.88	8.39	1.93	0.2	99.75
TR1_b_07.spc	fld	micro	poor	64.14	0.43	20.67	0.85	0.04	0.17	2.66	7.72	2.93	0.17	99.78
TR1_g_03.spc	fld	micro	poor	64.13	0.4	20.67	0.8	0.25	0.21	2.22	8.35	2.83	0	99.86
TR1_b_06.spc	fld	micro	poor	64.06	0.31	20.85	0.77	0.11	0.23	2.61	8.4	2.2	0.15	99.69
TR1_b_04.spc	fld	micro	poor	63.9	0.39	20.69	0.98	0.13	0.09	2.75	8.75	2.32	0	100
TR1_b_01.spc	fld	micro	poor	63.89	0.4	20.71	0.85	0.19	0.17	2.66	8.68	2.12	0.15	99.82
TR1_a_06.spc	fld	micro	poor	63.8	0.39	21.1	0.75	0.08	0.19	3.04	8.7	1.71	0.09	99.85
TR1_a_10.spc	fld	micro	poor	63.54	0.49	20.73	0.92	0.13	0.1	2.93	8.47	2.07	0.28	99.66
TR1_b_03.spc	fld	micro	poor	63.34	0.43	20.95	1.26	0.1	0.23	3.23	8.82	1.57	0.07	100
TR1_a_09.spc	fld	micro	poor	63.27	0.38	20.96	0.99	0.17	0.21	2.9	8.72	2.01	0.15	99.76
TR1_a_04.spc	fld	micro	poor	63.2	0.41	21.17	0.86	0.17	0	3.14	9.05	1.51	0.24	99.75
TR1_b_09.spc	fld	micro	poor	63.07	0.3	21.83	0.78	0.11	0.13	3.65	8.69	1.35	0	99.91
TR1_g_02.spc	fld	micro	poor	62.03	0.39	16.34	5.72	0.46	2.64	1.79	7.37	2.95	0.08	99.77
TR1_f_05.spc	fld	pheno	rich	58.01	0.16	25.69	0.67	0.18	0.26	7.31	7.03	0.56	0	99.87
TR1_f_01.spc	fld	pheno	rich	57.4	0.34	25.86	0.68	0.2	0.24	7.6	6.51	0.52	0.28	99.63
TR1_b_25.spc	fld	micro	poor	66.5	0.29	18.77	0.98	0.08	0.25	1.29	7.66	4.07	0	99.89
TR1_a_16.spc	px	micro	poor	67.62	0.31	15.62	1.58	0.17	1.14	1.69	5.2	6.25	0.15	99.73
TR1_b_20.spc	px	micro	poor	66.55	0.55	15.77	2.18	0.3	1.75	1.63	6.02	4.81	0.3	99.86
TR1_a_13.spc	px	micro	poor	60.08	0.41	11.74	10.08	0.79	5.69	2.68		2.27	0.25	93.99
TR1_c_15.spc	px	micro	rich	59.32	0.65	12.81	5.69	0.39	7.88	4.83	5.27	2.99	0	99.83
TR1_b_19.spc	px	micro	poor	56.44	0.54	6.45	18.22	1.26	10.28	2.09	1.76	2.64	0.08	99.76
TR1_c_11.spc	px	micro	rich	55.77	0.68	5.69	13.14	0.55	12.64	7.37	2.49	1.38	0.12	99.83
TR1_a_15.spc	px	micro	poor	55.3	0.58	7.98	10.94	0.73	6.64	11.1	4.13	1.03	0.51	98.94
TR1_h_09.spc	px	micro	poor	55.25	0.65	0.61	16.86	1.44	19.7	4.37	0.49	0.15	0.14	99.66
TR1_b_18.spc	px	micro	poor	55.03	0.6	0.88	20.44	1.4	17.37	3.12	0.57	0.23	0.15	99.79
TR1_b_15.spc	px	micro	poor	54.82	0.84	1.64	13.08	1.05	13.71	13.02	0.77	0.49	0.36	99.78
TR1_a_14.spc	px	micro	poor	54.29	0.9	4.38	11.71	0.69	15.19	8.67	2.95	1.09	0.13	100
TR1_b_12.spc	px	micro	poor	54.15	0.57	0.33	19.25	1.55	20.28	3.3	0.24	0.14	0	99.81
TR1_h_07.spc	px	micro	poor	54.03	0.82	3.5	9.94	0.49	18.47	8.31	3.48	0.73	0	99.77
TR1_f_02.spc	px	pheno	rich	54	0.45	1.63	7.33	0.59	17.44	17.71	0.58	0.09	0	99.82
TR1_h_08.spc	px	micro	poor	53.99	0.85	3.81	8.82	0.49	19.15	8.08	3.78	0.84	0	99.81
TR1_h_06.spc	px	micro	poor	53.82	0.83	3.66	9.92	0.53	18.43	8.23	3.64	0.77	0	99.83
TR1_g_06.spc	px	micro	poor	53.69	0.6	0.61	12.89	1.13	15.08	14.91	0.58	0.19	0.13	99.81
TR1_g_08.spc	px	micro	poor	53.61	0.6	0.73	15.61	1.27	12.77	14.16	0.57	0.18	0.28	99.78
TR1_b_11.spc	px	micro	poor	53.57	0.39	0.69	19.21	1.51	20.29	3.44	0.41	0.11	0.15	99.77
TR1_a_17.spc	px	micro	poor	53.55	0.62	1.9	13	1.19	13.73	14.31	1.2	0.28	0.09	99.87
TR1_b_17.spc	px	micro	poor	53.4	0.33	1.13	25.03	1.8	13.96	2.98	0.54	0.4	0.17	99.74
TR1_a_18.spc	px	micro	poor	53.38	0.67	0.96	13.54	1.22	14.63	14.06	0.63	0.23	0.26	99.58
TR1_b_13.spc	px	micro	poor	53.38	0.68	0.65	12.45	1.1	14.9	15.58	0.57	0.2	0.25	99.76
TR1_a_12.spc	px	micro	poor	53.31	0.48	0.49	21.89	1.52	18.08	3.04	0.27	0.23	0.33	99.64
TR1_g_09.spc	px	micro	poor	53.27	0.44	0.33	21.41	1.58	18.33	3.78	0.35	0.13	0.09	99.71
TR1_b_16.spc	px	micro	poor	53.05	0.47	0.6	22.57	1.5	17.11	3.58	0.44	0.21	0.13	99.66
TR1_c_12.spc	px	micro	rich	52.56	0.44	0.48	24.75	1.85	16.29	2.94	0.34	0.14	0	99.79
TR1_g_07.spc	px	micro	poor	52.54	0.52	0.35	23.51	1.64	17.35	3.19	0.45	0.21	0	99.76
TR1_e_05.spc	px	pheno	rich	51.99	1	4.29	12.02	0.66	16.64	9.26	3.25	0.79	0.1	100
TR1_d_12.spc	px	micro	rich	51.75	1.13	3.71	13.09	0.69	16.33	9.3	2.92	0.97	0	99.89
TR1_d_11.spc	px	micro	rich	51.74	0.93	4.07	12.98	0.62	16.55	9.26	2.75	0.89	0.13	99.92
TR1_c_14.spc	px	micro	rich	51.64	0.93	4.08	12.2	0.46	16.95	9.49	3.22	0.87	0	99.84
TR1_b_14.spc	px	micro	poor	51.47	1.5	0.55	17.55	0.98	12.86	13.15	0.69	0.2	0.92	99.87
TR1_c_13.spc	px	micro	rich	51.46	0.97	4.37	12.07	0.65	17.07	9.5	3.03	0.88	0	100
TR1_d_13.spc	px	micro	rich	51.4	1.17	3.82	13.21	0.59	16.15	9.37	3.11	1.08	0	99.9
TR1_a_11.spc	px	micro	poor	51.33	0.61	0.72	23.94	1.47	16.45	3.2	0.54	0.42	0.19	98.87
TR1_d_14.spc	px	micro	rich	51.06	1.27	4.52	13.24	0.75	15.8	9.37	2.93	0.89	0.08	99.91
TR1_e_07.spc	px	pheno	rich	51.06	0.94	4.68	12.7	0.64	16.25	9.06	3.49	0.86	0.07	99.75
TR1_e_06.spc	px	pheno	rich	50.99	1.05	4.61	12.95	0.79	15.88	9.08	3.34	0.93	0.17	99.79
TR1_c_16.spc	px	micro	rich	50.73	0.92	5.02	12.39	0.68	16.28	9.83	3.06	0.98	0.11	100
TR1_d_18.spc	ox	micro	rich	1.01	12.36	0.76	83.19	1.04	0.39	0.16	0.33	0.18	0.21	99.63
TR1_f_03.spc	ox	pheno	rich	0.48	15.86	1.06	79.67	1.42	0.74	0.14	0.29	0	0.18	99.84
TR1_c_21.spc	ox	micro	rich	0.77	12.43	0.74	83.08	1.25	0.36	0.24	0.28	0.28	0.21	99.64
TR1_c_18.spc	ox	micro	rich	0.76	11.64	0.58	83.81	1.28	0.19	0.37	0.47	0.19	0.29	99.58
TR1_d_15.spc	ox	micro	rich	0.67	12.7	0.88	82.62	0.93	0.57	0.16	0.2	0.24	0.5	99.47
TR1_c_22.spc	ox	micro	rich	1.35	11.58	0.73	83.26	1.12	0.2	0.3	0.51	0.3	0.18	99.53
TR1_c_20.spc	ox	micro	rich	1.05	12.72	1.01	81.98	1.02	0.4	0.23	0.29	0.29	0.48	99.47
TR1_h_10.spc	ox	micro	poor	0.86	47.84	0.25	46.72	1.7	0.99	0.22	0	0.31	0.47	99.36
TR1_h_11.spc	ox	micro	poor	0.61	47.43	0.11	47.05	1.89	1.43	0.15	0.28	0.18	0.38	99.51
TR1_g_11.spc	ox	micro	poor	0.74	47.84	0.39	46.51	1.39	1.84	0.27	0.16	0.27	0.24	99.65
TR1_c_19.spc	ox	micro	rich	1.74	14.36	1.08	79.25	1.25	0.49	0.43	0	0.4	0.33	99.33
TR1_d_16.spc	ox	micro	rich	0.99	46.65	0.65	46.71	1.86	1.04	0.13	0.48	0.19	0.66	99.36
TR1_c_17.spc	ox	micro	rich	3.08	12.98	1.34	79.17	1.05	0.32	0.29	0.48	0.41	0.26	99.38
TR1_g_10.spc	ox	micro	poor	3.99	43.81	0.46	46.5	1.43	2.08	0.55	0.35	0.21	0.25	99.63
TR1_d_17.spc	ox	micro	rich	4.86	12.32	1.53	77.47	0.89	0.4	0.36	0.99	0.34	0.21	99.37
TR1_c_25.spc	ox	micro	rich	3.27	45.2	0.89	44.57	2.37	0.63	0.9	0.25	0.44	0.26	98.78
TR1_c_24.spc	ox	micro	rich	7.14	42.63	2.01	43.52	1.79	0.54	0.31	1	0.65	0	99.59
TR1_a_20.spc	ox	micro	poor	9.56	21.48	2.33	58.24	1.83	0.72	0.36	2.83	0.56	1.18	99.09

## Sheet: TR6 
Analysis	mineral	type	bubble	SiO2	TiO2	Al2O3	FeO	MnO	MgO	CaO	Na2O	K2O	Total
TR6_a_01.spc	fld	micro	rich	65.89	0.26	19.21	0.5	0.17	0	0.77	8.19	4.52	99.51
TR6_a_02.spc	fld	micro	rich	65.8	0.09	20	0.18	0	0.11	1.22	8.92	3.49	99.81
TR6_a_03.spc	fld	micro	rich	65.07	0.24	19.93	0.44	0.08	0.1	1.26	9.14	3.33	99.59
TR6_a_04.spc	fld	micro	rich	65.61	0.2	19.58	0.53	0.1	0.19	1.14	9.03	3	99.38
TR6_a_05.spc	fld	micro	rich	66.1	0.26	19.01	0.55	0.08	0.22	0.73	8.34	4.15	99.44
TR6_a_06.spc	fld	micro	rich	65.1	0.14	20.18	0.43	0	0	1.58	9	3.02	99.45
TR6_a_07.spc	fld	micro	rich	64.47	0.18	20.86	0.37	0.05	0.21	1.9	9.89	1.87	99.8
TR6_a_08.spc	fld	micro	rich	65.68	0	20.39	0.2	0	0.12	1.41	9.53	2.66	99.99
TR6_a_09.spc	fld	micro	rich	66.57	0.13	19.11	0.26	0	0.06	0.57	7.87	5.09	99.66
TR6_a_10.spc	fld	micro	rich	66.1	0.16	19.38	0.4	0	0.12	0.86	8.38	4.35	99.75
TR6_b_01.spc	fld	micro	poor	62.29	0.3	21.54	0.55	0.15	0	2.38	9.94	2.17	99.32
TR6_b_02.spc	fld	micro	poor	63.74	0.24	20.6	0.4	0.12	0.19	1.77	10.63	1.78	99.47
TR6_b_03.spc	fld	micro	poor	64.39	0.15	20.61	0.52	0.06	0.13	1.61	9.87	2.17	99.51
TR6_b_04.spc	fld	micro	poor	64.77	0.2	19.69	0.35	0.08	0.25	1.04	10.53	2.37	99.28
TR6_b_05.spc	fld	micro	poor	62.6	0.26	21.64	0.47	0	0.22	2.71	10.45	1.06	99.41
TR6_b_06.spc	fld	micro	poor	62.35	0.34	21.71	0.58	0.08	0.11	2.54	10.36	1.14	99.21
TR6_b_07.spc	fld	micro	poor	65.9	0.04	19.29	0.37	0	0.29	0.64	9.1	3.91	99.54
TR6_b_08.spc	fld	micro	poor	67.2	0.28	18.28	0.53	0.07	0	0.37	6.82	6.03	99.58
TR6_b_09.spc	fld	micro	poor	64.42	0.23	20.13	0.34	0	0.19	1.23	10.21	2.9	99.65
TR6_b_10.spc	fld	micro	poor	64.52	0.16	20.61	0.41	0	0.1	1.54	9.65	2.65	99.64
TR6_c_01.spc	fld	micro	rich	63.99	0.23	21.42	0.61	0.1	0.09	2.51	9.27	1.35	99.57
TR6_c_02.spc	fld	micro	rich	64.11	0.21	21.13	0.54	0.04	0.14	2.56	9.42	1.38	99.53
TR6_c_03.spc	fld	micro	rich	63.76	0.13	21.62	0.45	0	0.23	2.73	9.46	1.35	99.73
TR6_c_04.spc	fld	micro	rich	66.27	0.06	19.81	0.32	0	0.18	1.21	8.52	3.45	99.82
TR6_c_05.spc	fld	micro	rich	65.33	0.17	20.54	0.33	0	0.05	1.96	8.98	2.52	99.88
TR6_c_06.spc	fld	micro	rich	64.77	0.29	20.61	0.55	0.12	0.1	1.83	9.33	1.97	99.57
TR6_c_07.spc	fld	micro	rich	64.62	0.31	20.51	0.42	0.09	0.29	2.06	8.95	2.27	99.52
TR6_c_08.spc	fld	micro	rich	64.98	0.22	20.57	0.36	0.07	0.26	2.03	8.96	2.33	99.78
TR6_d_01.spc	fld	micro	poor	61.07	0.24	23.36	0.85	0.06	0.28	4.51	8.35	0.77	99.49
TR6_d_02.spc	fld	micro	poor	63.27	0.25	21.57	0.54	0.05	0.25	2.82	8.72	2.07	99.54
TR6_d_03.spc	fld	micro	poor	65.47	0.21	19.68	0.46	0.15	0.13	1.17	8.41	3.76	99.44
TR6_d_04.spc	fld	micro	poor	64.04	0.24	21.3	0.54	0.12	0	2.69	9.16	1.53	99.62
TR6_d_05.spc	fld	micro	poor	63.56	0.21	21.54	0.65	0	0.14	2.81	9.28	1.28	99.47
TR6_d_06.spc	fld	micro	poor	64.19	0.26	21.14	0.44	0	0.09	2.36	9.43	1.73	99.64
TR6_d_07.spc	fld	micro	poor	65.51	0.25	19.45	0.54	0.1	0.17	1.09	8.95	3.37	99.43
TR6_d_08.spc	fld	micro	poor	64.71	0.26	20.35	0.46	0.06	0.17	1.87	8.96	2.78	99.62
TR6_b_14.spc	fld	micro	poor	62.99	0.23	21.34	0.55	0.12	0.47	2.23	10.64	0.98	99.55
TR6_b_11.spc	fld	micro	poor	65.32	0.1	19.44	0.35	0.1	0.54	1.46	10.18	1.88	99.37
TR1_e_03.spc	fld	pheno	rich	65.39	0.32	19.22	0.56	0.11	0.13	1.08	7.7	4.9	99.41
TR1_e_04.spc	fld	pheno	rich	66.04	0.29	18.91	0.49	0.1	0.17	0.83	6.89	6.06	99.78
TR1_f_01.spc	fld	pheno	rich	57.4	0.34	25.86	0.68	0.2	0.24	7.6	6.51	0.52	99.35
TR1_f_05.spc	fld	pheno	rich	58.01	0.16	25.69	0.67	0.18	0.26	7.31	7.03	0.56	99.87
TR6_b_15.spc	px	micro	poor	56.93	0.48	0.66	18.15	1.22	18.62	2.41	0.39	0.17	99.03
TR6_c_12.spc	px	micro	rich	54.98	0.68	0.66	20.11	1.35	18.6	2.5	0.58	0.12	99.58
TR6_d_12.spc	px	micro	poor	53.81	0.77	0.74	22.55	1.55	16.37	2.94	0.4	0.11	99.24
TR6_a_14.spc	px	micro	rich	56.56	0.1	0.91	20.93	1.07	15.04	4.17	0.95	0.04	99.77
TR6_a_11.spc	px	micro	rich	55.83	0.15	0.69	22.91	1.34	13.7	3.87	0.52	0.23	99.24
TR6_a_16.spc	px	micro	rich	56.17	0.2	1.06	21.86	1.38	13.3	4.66	0.49	0.29	99.41
TR6_a_12.spc	px	micro	rich	56.11	0.34	0.77	17.27	1.07	14.7	8.55	0.71	0.09	99.61
TR6_d_09.spc	px	micro	poor	55.12	0.64	0.57	14.66	0.96	15.46	11.42	0.61	0.12	99.56
TR6_c_13.spc	px	micro	rich	55.39	0.68	0.84	13.69	1.23	14.85	11.73	0.94	0.15	99.5
TR6_d_13.spc	px	micro	poor	54.76	0.71	1.19	14.19	1.01	14.04	12.4	0.88	0.23	99.41
TR6_d_14.spc	px	micro	poor	56.01	0.48	2.8	13.62	0.83	12.23	11.93	1.31	0.56	99.77
TR6_c_09.spc	px	micro	rich	56.66	0.67	4.81	10.18	0.81	13.65	10.46	1.78	0.37	99.39
TR6_d_11.spc	px	micro	poor	55.8	0.52	3.16	11.01	0.87	13.49	12.43	1.72	0.5	99.5
TR6_d_10.spc	px	micro	poor	54.78	0.49	0.61	12.7	0.78	12.78	16.4	0.67	0.14	99.35
TR6_a_13.spc	px	micro	rich	59.19	0.24	10.51	13.75	0.77	6.83	1.94	4.04	2.14	99.41
TR6_b_13.spc	px	micro	poor	58.37	0.3	12.73	8.81	0.53	10.24	2.56	5.16	0.56	99.26
TR6_c_11.spc	px	micro	rich	58.91	0.43	7.79	8.56	0.48	9.93	10.26	2.89	0.48	99.73
TR6_d_15.spc	ox	micro	poor	2.44	8.82	1.74	84.73	0.25	0.68	0.21	0.83	0.04	99.74
TR6_d_17.spc	ox	micro	poor	3.36	7.16	1.18	84.39	0.62	1.81	0.29	0.56	0.2	99.57
TR6_c_15.spc	ox	micro	rich	4.42	8.17	1.47	79.78	0.75	3.04	0.57	1.04	0.22	99.46
TR6_c_16.spc	ox	micro	rich	4.33	10.5	1.59	79.06	0.76	1.18	0.65	0.84	0.31	99.22
TR6_c_18.spc	ox	micro	rich	0.94	17.47	1.61	76.63	1.03	0.85	0.26	0.43	0.23	99.45
TR6_c_14.spc	ox	micro	rich	5.89	22.56	1.35	65.77	0.88	2.23	0.57	0.36	0.11	99.72
TR1_f_03.spc	ox	pheno	rich	0.48	15.86	1.06	79.67	1.42	0.74	0.14	0.29	0	99.66
TR1_e_01.spc	qtz	pheno	rich	96.42	0.26	1.34	0.35	0.18	0.19	0.14	0.4	0.3	99.58
TR1_e_02.spc	qtz	pheno	rich	96.89	0.17	1.13	0.3	0.19	0.17	0.12	0.38	0.24	99.59
